# Supplementary material
Source: Springer Nature journal article supplement (https://www.springermedizin.de/resource/supplementary/12889_2012_5024_MOESM6_ESM.pdf/9493224)
Supplement: MOESM6 [file 9493224]

**Table 3**

Factors predicting health insurance uptake adjusted for registration status

|                                                            | <b>Uninsured<br/>(n=401)</b> |             | <b>Basic MIS only<br/>(n=697)</b> |             | <b>Additional MIS<br/>only (n=91)</b> |             | <b>Basic + Additional<br/>MIS (n=310)</b> |             |
|------------------------------------------------------------|------------------------------|-------------|-----------------------------------|-------------|---------------------------------------|-------------|-------------------------------------------|-------------|
|                                                            | Adjusted OR<br>(95% C.I.)    |             | Adjusted OR<br>(95% C.I.)         |             | Adjusted OR<br>(95% C.I.)             |             | Adjusted OR<br>(95% C.I.)                 |             |
| Registration status<br>(migrant) <sup>1</sup>              | 5.00                         | (3.53,7.07) | 0.45                              | (0.35,0.58) | 2.99                                  | (1.66,5.37) | 0.50                                      | (0.36,0.68) |
| Occupation                                                 |                              |             |                                   |             |                                       |             |                                           |             |
| Executive/<br>professional/<br>managerial                  | 0.52                         | (0.29,0.94) | 0.99                              | (0.69,1.43) | 0.46                                  | (0.17,1.22) | 1.29                                      | (0.88,1.91) |
| Ordinary worker                                            | 1                            |             | 1                                 |             | 1                                     |             | 1                                         |             |
| Unemployed                                                 | 2.58                         | (1.76,3.79) | 0.67                              | (0.50,0.90) | 1.28                                  | (0.72,2.28) | 0.68                                      | (0.47,0.99) |
| Chronic disease<br>diagnosis <sup>2</sup>                  | 1.07                         | (0.65,1.77) | 1.21                              | (0.83,1.77) | 0.60                                  | (0.24,1.48) | 0.79                                      | (0.49,1.26) |
| Doctor consultation in<br>previous 30 days <sup>2</sup>    | 0.94                         | (0.52,1.70) | 0.99                              | (0.61,1.60) | 0.52                                  | (0.16,1.70) | 1.13                                      | (0.60,2.12) |
| Hospital admission in<br>previous 12 months <sup>2</sup>   | 0.44                         | (0.21,0.93) | 1.19                              | (0.66,2.17) | 2.75                                  | (1.07,7.09) | 1.04                                      | (0.48,2.26) |
| Source of healthcare<br>service utilisation <sup>3</sup>   |                              |             |                                   |             |                                       |             |                                           |             |
| Tier 1 (Community<br>health centre and<br>private clinics) | 1                            |             | 1                                 |             | 1                                     |             | 1                                         |             |
| Tier 2 (Regional<br>hospital)                              | 0.74                         | (0.48,1.14) | 1.09                              | (0.76,1.56) | 0.79                                  | (0.39,1.58) | 1.38                                      | (0.87,2.19) |
| Tier 3 (Municipal/<br>Provincial hospital)                 | 0.73                         | (0.48,1.12) | 0.98                              | (0.70,1.37) | 0.74                                  | (0.36,1.53) | 1.61                                      | (1.04,2.49) |

Note: Regression also adjusted for gender, age, marital status and education

C.I. denotes lower and upper limit of 95% confidence interval.

<sup>1</sup>Registration status was dichotomised (reference = registered)<sup>2</sup>Variables were dichotomised chronic disease diagnosis (reference = absence of disease), health problems in previous 30 days (reference = none), doctor consultation in previous 30 days (reference = none), hospitalisation in previous 12 months (reference= none)<sup>3</sup>Source of healthcare service utilisation was segregated into three tiers (Box 2) (reference = tier1)
